# Supplementary material
Source: PubMed Central journal article supplement (PMC4214533)
Supplement: ASN.2013111207_ASN2013111207SupplementaryData.pdf [file ASN.2013111207_ASN2013111207SupplementaryData.pdf]

**Supplemental Table 1. Characteristics by Unknown and Known Cause Death**

| <b>Characteristics</b>                      | <b>Unknown cause of death<br/>(N= 349)</b> | <b>Known cause of death<br/>(N= 893)</b> |
|---------------------------------------------|--------------------------------------------|------------------------------------------|
| Mean age, y                                 | 26                                         | 25.9                                     |
| Mean BMI                                    | 27.5                                       | 26.1                                     |
| Black race                                  | 51%                                        | 55%                                      |
| Male                                        | 44%                                        | 49%                                      |
| Hemodialysis                                | 95%                                        | 94%                                      |
| Urban <sup>a</sup>                          | 81%                                        | 80%                                      |
| Neighborhood with $\geq 20\%$ below poverty | 43%                                        | 48%                                      |
| <b>Primary cause of ESRD</b>                |                                            |                                          |
| Diabetes Mellitus                           | 40%                                        | 37%                                      |
| Glomerulonephritis                          | 20%                                        | 23%                                      |
| AIDS associated nephropathy                 | 9%                                         | 10%                                      |
| Other                                       | 31%                                        | 30%                                      |
| <b>Comorbidities</b>                        |                                            |                                          |
| Hypertension                                | 73%                                        | 74%                                      |
| Diabetes Mellitus                           | 46%                                        | 42%                                      |
| Congestive heart failure                    | 14%                                        | 14%                                      |
| Atherosclerotic heart disease               | 1%                                         | 3%                                       |
| Other cardiac disease                       | 7%                                         | 7%                                       |
| Cerebrovascular disease                     | 2%                                         | 3%                                       |
| Chronic obstructive pulmonary disease       | 2%                                         | 1%                                       |
| Peripheral vascular disease                 | 4%                                         | 4%                                       |
| Malignancy                                  | 3%                                         | 2%                                       |
| Alcohol dependence                          | 1%                                         | 2%                                       |
| Drug dependence                             | 5%                                         | 6%                                       |
| Tobacco use                                 | 10%                                        | 10%                                      |
| Needs assistance ADL                        | 10%                                        | 10%                                      |
| <b>Insurance</b>                            |                                            |                                          |
| No medical insurance                        | 24%                                        | 20%                                      |
| <b>Seen by nephrologist pre-ESRD</b>        |                                            |                                          |
| No                                          | 42%                                        | 42%                                      |
| Unknown                                     | 13%                                        | 14%                                      |
| <b>Type of access (HD Patients)</b>         |                                            |                                          |
| Arteriovenous Fistula                       | 6%                                         | 4%                                       |
| Arteriovenous Graft                         | 2%                                         | 2%                                       |
| Catheter                                    | 91%                                        | 93%                                      |
| Unknown                                     | 1%                                         | 1%                                       |

-----  
 Abbreviations: ESRD, end stage renal disease; HD, hemodialysis; ADL, activities of daily living; AIDS, acquired immune deficiency syndrome; BMI, body mass index, SD, standard deviation
